# Supplementary material for: Facile Preparation and Enhanced Visible-Light Photocatalysis of ZnO Arrays@BiOI Nanosheets Heterostructures
Source: Hindawi journal article supplement (doi:10.1155/2019/4508687), 2019-11-15
Supplement: f1 [file 4508687.f1.doc]

**Supporting Information**

**Facile preparation and enhanced visible-light photocatalysis of ZnO-arrays@BiOI-nanosheets heterostructures**

Da Zhang*, Yuanyi Wang, Liang Chen, Chengjing Xiao, Jing Feng, Lingmin Liao, Tao Wei, and Zaiqin Wang

*Changjiang River Scientific Research Institute, Wuhan, 430010, China*

*Corresponding author: Dr. Da Zhang, zhangda@mail.crsri.cn


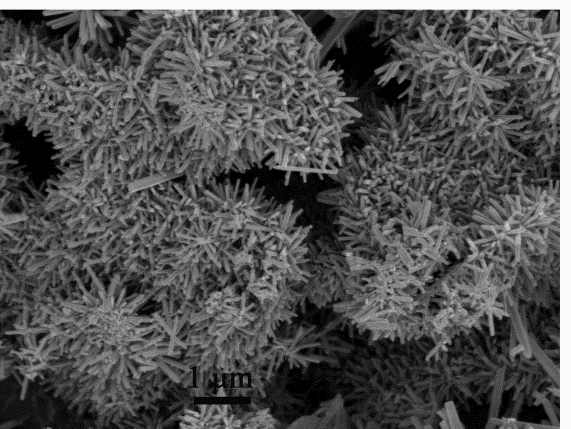

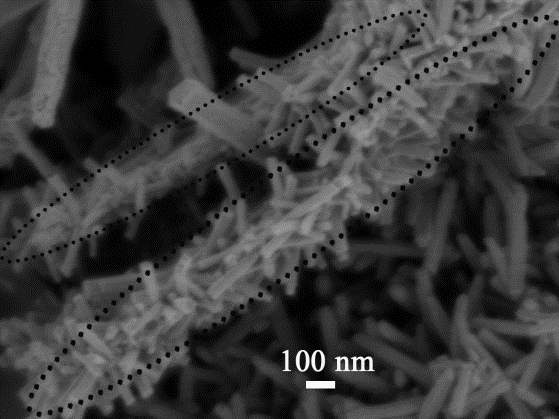


a

b

Figure S1. SEM images of the ZnO/BiOI composite product after photocatalytic experiment.


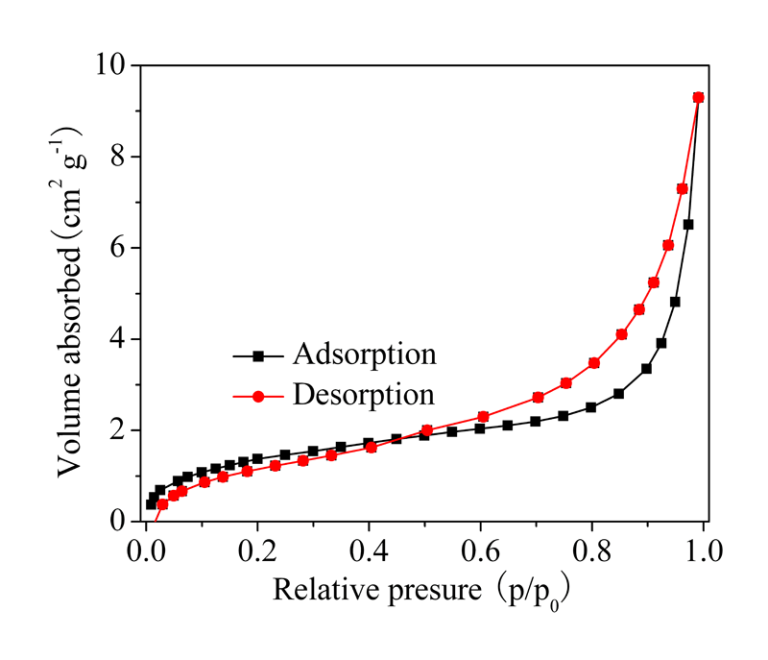


Figure S2. The BET result of the ZnO/BiOI composite product.

The N2 adsorption-desorption isotherm curve is type III. This isotherm shows that weak gas-solid interaction occurs on non-porous or macroporous solids. The specific surface area of the product is 0.9416 m2/g..


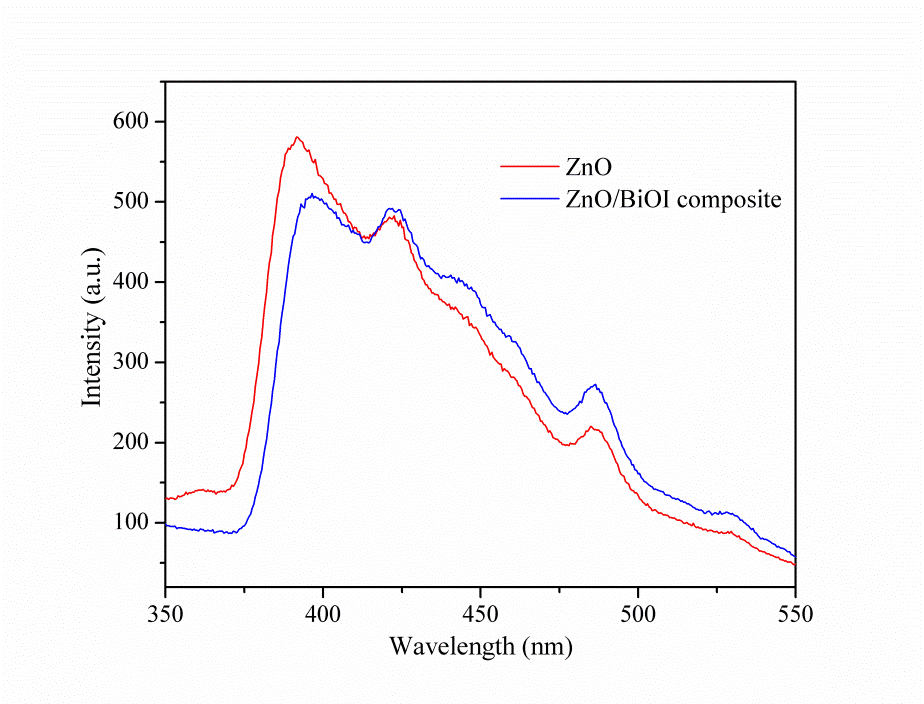


a

b

Figure S3. The spectra of pure ZnO arrays and ZnO/BiOI composite product.

The fluorescence emission curves of the two materials are similar, with peaks at 400, 425 and 490 nm, respectively. The strongest emission peaks at 400 nm are attributed to free exciton recombination and quantum confinement effect of semiconductor ZnO. The fluorescence emission intensity of pure ZnO at 400 nm is higher than that of ZnO/BiOI composite. The semiconductor composite enhances the electrons and holes generated by photoexcitation. The emission peak at 425 nm is attributed to the interface defects on the surface of ZnO crystal. The blue-green light at 490-550 nm is caused by the excitation scattering of defects, usually by oxygen vacancies. The relative emission intensity of ZnO/BiOI composite in the visible region is higher than that of pure ZnO. The main reason is the incensement of the number of related defects.
